# Supplementary material
Source: PubMed Central journal article supplement (PMC4930698)
Supplement: NIHMS778342-supplement-2.pdf [file NIHMS778342-supplement-2.pdf]

| Supplemental Figure 1                     |                           |                                |                                |
|-------------------------------------------|---------------------------|--------------------------------|--------------------------------|
| Primers for Targeted Bisulfite Sequencing |                           |                                |                                |
| Gene Name                                 | Region Sequenced          | Forward Primer (5'-3')         | Reverse Primer (5'-3')         |
| LINE1                                     | Accession#D84391.976-1072 | GTTAGAGAATTGATAGTTTTGGAATAGG   | CCAAAAACAAAACCTTCTCAAACACTATAT |
| H19                                       | chr7:149766621-149766690  | GTTTGTGAATTAGTTGTGGGTTTATA     | TAAAAAATAAACTCAATCAATTACAATCC  |
| Hes1                                      | chr16:30055572-30055738   | TAGGTAGTTTGTTTTTAAGGAAGTTAG    | ACAACCCAACACACCTATAATTT        |
| Dusp6                                     | chr10:98728738-98729028   | TTTATGTAGAAGTATTGTTTATGAA      | TAACACAAACAACACTACTTTTAAC      |
| c-Fos                                     | chr12:86817243-86817533   | GGTATAGAGTTGAGTTTTGTGTAT       | CCTTAAACCCACACCTAATATATTT      |
| Vdr                                       | chr15:97731208-97731590   | ATGGTTAAAGTTTGTTTTTGGTTTTT     | TTAACTCCTTCCATAACAACCTCTC      |
| Olfm4                                     | chr14:80399983-80400271   | AGTGGGGTTTGGTGTAAAG            | ACACAATCCCACCTTCTACC           |
| MGMT                                      | chr7:144086076-144086345  | GGAATAAGTATTTAGGGAGGAAGTATAGAG | CCCCAAAACCTCACCACCTTACA        |
| SFRP5                                     | chr19:42276328-42276453   | GTTTGGGTAGTAGAATAGTTGA         | CAAATAAATAACAATCTCTAC          |
| HIC1                                      | chr11:74983743-74983918   | GGGAGGGGAGAGTGTATTAGTTT        | AAAACCTCATTAAATACCATAATAACTCT  |
| S100A4                                    | chr3:90407319-90407489    | TTGGAGGGAAGTGTGATATTG          | CATAACCCCTCCACCAACCAATCT       |
| MSLN                                      | chr17:25891502-25891643   | AGAATTGGAAGTATAGGATAAAGAGAT    | ACCTAATACCATTATTTACCTACTA      |
| Primers for q-RTPCR                       |                           |                                |                                |
| Gene Name                                 |                           | Forward Primer (5'-3')         | Reverse Primer (5'-3')         |
| Dnmt1                                     |                           | CTTCACCTAGTCCCGTGGCTA          | CCCTCTCCGACTCTTCCTT            |
| Beta-actin                                |                           | GAAGTGTGACGTGACATCCG           | GTCAGCAATGCCTGGGTACAT          |
| TBP                                       |                           | CCCCCTGTACCCTTACCAAT           | GAAGCTCGGTACAATTCAG            |
